# Supplementary material
Source: PubMed Central journal article supplement (PMC5031416)
Supplement: NIHMS794947-supplement-1.pdf [file NIHMS794947-supplement-1.pdf]

Supplementary Figure 1.

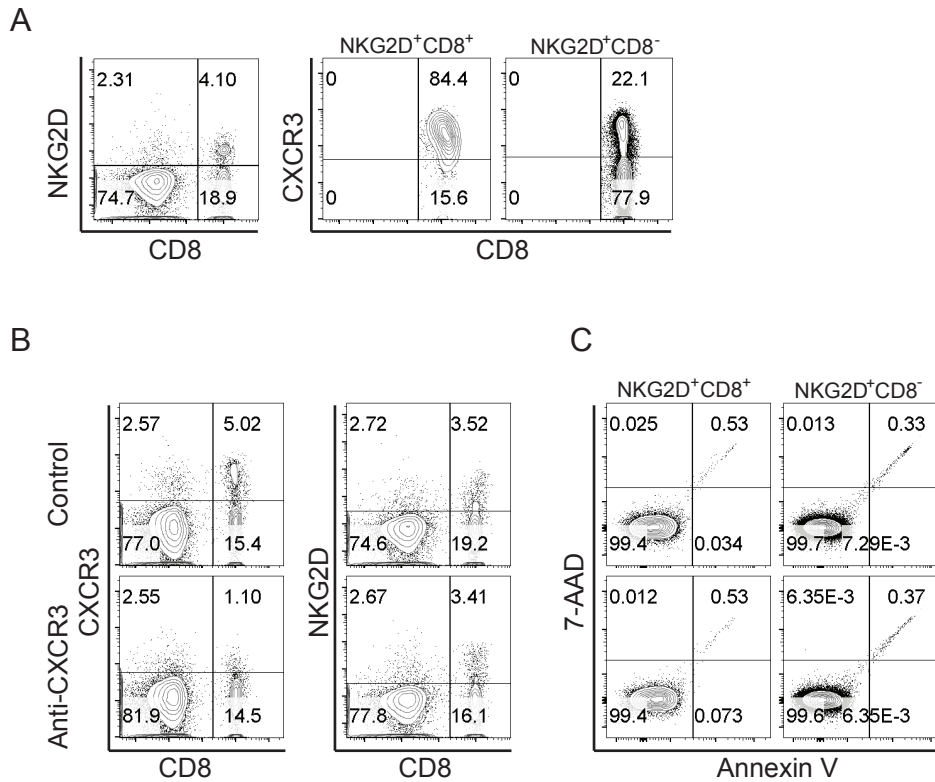

**Supplementary figure 1. Down-regulation of the expression of CXCR3 on T cells by anti-CXCR3 Ab treatment.** (a) NKG2D<sup>+</sup>CD8<sup>+</sup> T cells are CXCR3 positive in SDLN from C3H/HeJ mice with AA. (b) C3H/HeJ AA mice were treated with 1 mg anti-CXCR3 mAb (CXCR3-173) or isotype Ab for 1 week. SDLN cells from these two groups were first stained with anti-CXCR3 mAb (CXCR3-173) without fluorescent conjugation. Fluorescent conjugated anti-hamster (Armenian) specific secondary Ab (no cross with mouse or rat) was then used for the detection of anti-CXCR3 mAb on cell surfaces. After which the cells were stained with other fluorescent conjugated Abs (all rat). The dead cells were determined by 7-AAD and Annexin V staining.

Supplementary Figure 2.

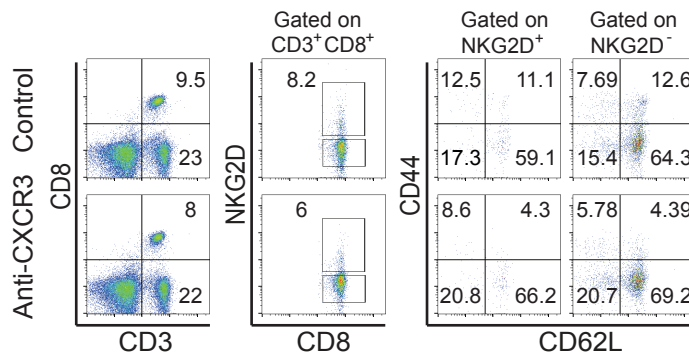

**Supplementary figure 2. CXCR3 blockade reduces CD44<sup>hi</sup>CD62L<sup>hi</sup> (central memory) and CD44<sup>hi</sup>CD62L<sup>low</sup> (effector/memory) T cells among the NKG2D<sup>-</sup>CD8<sup>+</sup> T cells.** (a) CD44<sup>hi</sup>CD62L<sup>hi</sup> (central memory) and CD44<sup>hi</sup>CD62L<sup>low</sup> (effector/memory) T cells among the NKG2D<sup>-</sup>CD8<sup>+</sup> T cells within SDLNs in C3H/HeJ mice expressed high level of CXCR3. (b) The frequency of CD44<sup>hi</sup>CD62L<sup>hi</sup> and CD44<sup>hi</sup>CD62L<sup>low</sup> T cells among the NKG2D<sup>-</sup>CD8<sup>+</sup> T cells within SDLNs in C3H/HeJ mice was reduced by anti-CXCR3 mAb treatment.
